# Supplementary material for: MicroRNA-198 suppresses prostate tumorigenesis by targeting MIB1
Source: PubMed Central journal article supplement — Oncol Rep. 2019 Jul 15;42(3):1047–56. doi: 10.3892/or.2019.7234 (PMC6667842; doi:10.3892/or.2019.7234), 2019-07-15
Supplement: Supplementary_Data.pdf [file Supplementary_Data.pdf]

Figure S1. Transfection efficiencies. RT-qPCR results confirmed elevated miR-198 after (A) mimic transfection and (B) stable lentivirus transduction. Values relative to samples with control mimic/lentivirus, with RNU6-2 used as a reference gene for normalization. (C) RT-qPCR and (D) western blot results demonstrating knockdown of MIB1 using siRNA. PCR abundance relative to samples transfected with control siRNA and normalized to GAPDH. MIB1, mindbomb E3 ubiquitin protein ligase 1.

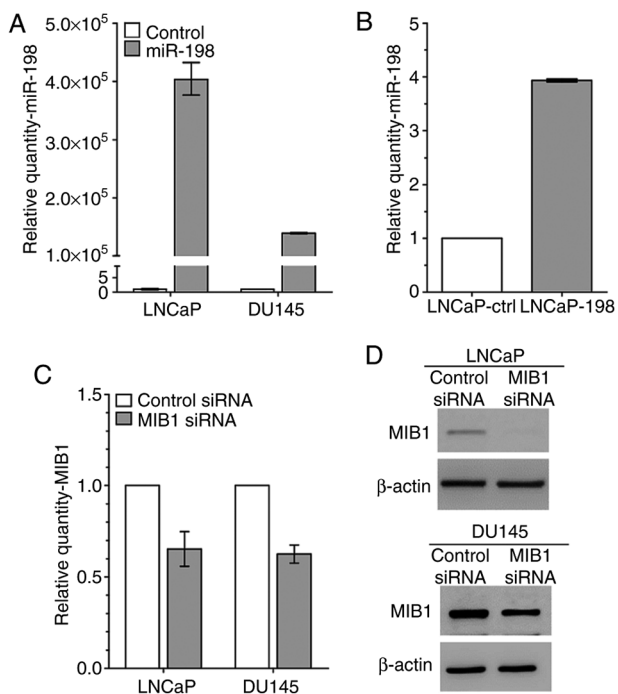

Figure S2. Notch-luciferase activity in LS174T cells. Treatment with Notch inhibitor DAPT suppressed Notch-luciferase reporter activity in the colon cancer cell line LS174T, however, corresponding with their effects in LNCaP cells, luciferase activity remained unchanged by miR-198 mimic and MIB1 siRNA. Fold change was normalized to the respective experimental control. MIB1, mindbomb E3 ubiquitin protein ligase 1.

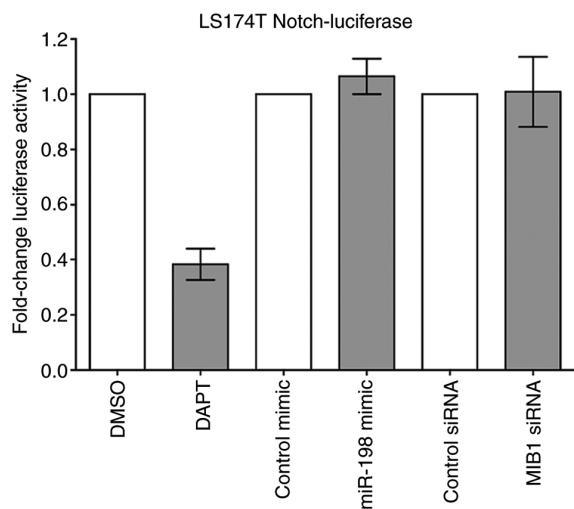

Table SI. Mimic and siRNA sequences.

| Product                | Sense                  | Antisense              |
|------------------------|------------------------|------------------------|
| Negative control mimic | UUCUCCGAACGUGUCACGUTT  | ACGUGACACGUUCGGAGAATT  |
| miR-198 mimic          | GGUCCAGAGGGGAGAUAGGUUC | ACCUAUCUCCCCUCUGGACCUU |
| Control siRNA          | UUCUCCGAACGUGUCACGUTT  | ACGUGACACGUUCGGAGAATT  |
| MIB1 siRNA             | GGAUAAAGAUGGUGAUAGATT  | UCUAUCACCAUCUUUAUCCTT  |
|                        | GCAUUUGAGUGUAGAGAAATT  | UUUCUCUACACUCAAUGCTT   |
|                        | GCAUAAGUGUCCACAUCUATT  | UAGAUGUGGACACUUAUGCTT  |

MIB1, mindbomb E3 ubiquitin protein ligase 1.

Table SII. qRT-PCR primer sequences.

| Primer                                        | Sequence                                                       |
|-----------------------------------------------|----------------------------------------------------------------|
| RNU6-2                                        | Qiagen cat. no. MS00033740                                     |
| miR-198                                       | Qiagen cat. no. MS00033824; GGUCCAGAGGGGAGAUAGGUUC             |
| GAPDH                                         | Forward: CAGCCTCAAGATCATCAGCA<br>Reverse: GTCTTCTGGGTGGCAGTGAT |
| MIB1                                          | Forward: ACCGGGAAGTGAGAGGGTT<br>Reverse: GCTATGTGGGCTTGATGCAC  |
| MIB1, mindbomb E3 ubiquitin protein ligase 1. |                                                                |

Table SIII. Abundance of previously validated miR-198 targets.

| Gene symbol   | Identified in            | qRT-PCR |       | Gene Array |       |
|---------------|--------------------------|---------|-------|------------|-------|
|               |                          | DU145   | LNCaP | DU145      | LNCaP |
| Livin (BIRC7) | Prostate and lung cancer | 0.6     | >1    | 1.07       | 0.82  |
| SHMT1         | Lung cancer              | 0.9     | 1.25  | 1.12       | 1.01  |
| FUT8          | Colorectal cancer        | 0.9     | 1.2   | 0.95       | 1.04  |
| CDCP1         | Breast cancer            | 1.0     | 0.9   | 0.93       | 0.97  |
| CCND2         | Epithelial cells         | 0.75    | 1.25  | 1.1        | 1.03  |
| MET           | Hepatocellular carcinoma | 1.0     | 1.15  | 0.96       | 0.95  |
| FGFR1         | Lung cancer              | Nt      | Nt    | 1.01       | 1.1   |
| ROCK1         | Osteosarcoma             | Nt      | Nt    | 0.82       | 0.99  |
| MGMT          | Glioblastoma             | Nt      | Nt    | 0.9        | 1.14  |
| MSLN          | Pancreatic cancer        | Nt      | Nt    | 1.25       | 0.91  |

Nt, not tested.
